# Supplementary material for: Positional Movement Demands during NFL Football Games: A 3-Year Review
Source: MDPI journal article supplement (doi:10.3390/app13169278), 2023-08-15
Supplement: s1 [file s1]

**Table S1.** Post-hoc results for in-game distance.

| Group 1 | Group 2 | Statistic | p-value | Corrected p-value |
|---------|---------|-----------|---------|-------------------|
| CB      | DL      | 75.21     | 0.000   | 0.000             |
| CB      | LB      | 25.48     | 0.000   | 0.000             |
| CB      | OL      | 69.77     | 0.000   | 0.000             |
| CB      | QB      | 15.03     | 0.000   | 0.000             |
| CB      | RB      | 54.23     | 0.000   | 0.000             |
| CB      | S       | -7.21     | 0.000   | 0.000             |
| CB      | TE      | 24.22     | 0.000   | 0.000             |
| CB      | WR      | 5.37      | 0.000   | 0.000             |
| DL      | LB      | -60.47    | 0.000   | 0.000             |
| DL      | OL      | 2.66      | 0.008   | 0.281             |
| DL      | QB      | -33.25    | 0.000   | 0.000             |
| DL      | RB      | -6.18     | 0.000   | 0.000             |
| DL      | S       | -85.81    | 0.000   | 0.000             |
| DL      | TE      | -40.27    | 0.000   | 0.000             |
| DL      | WR      | -69.09    | 0.000   | 0.000             |
| LB      | OL      | 55.65     | 0.000   | 0.000             |
| LB      | QB      | 1.88      | 0.060   | 1.000             |
| LB      | RB      | 42.40     | 0.000   | 0.000             |
| LB      | S       | -34.56    | 0.000   | 0.000             |
| LB      | TE      | 6.50      | 0.000   | 0.000             |
| LB      | WR      | -19.25    | 0.000   | 0.000             |
| OL      | QB      | -28.21    | 0.000   | 0.000             |
| OL      | RB      | -7.24     | 0.000   | 0.000             |
| OL      | S       | -78.20    | 0.000   | 0.000             |
| OL      | TE      | -35.88    | 0.000   | 0.000             |
| OL      | WR      | -64.48    | 0.000   | 0.000             |
| QB      | RB      | 24.98     | 0.000   | 0.000             |
| QB      | S       | -20.46    | 0.000   | 0.000             |
| QB      | TE      | 2.41      | 0.016   | 0.572             |
| QB      | WR      | -11.66    | 0.000   | 0.000             |
| RB      | S       | -63.11    | 0.000   | 0.000             |
| RB      | TE      | -28.54    | 0.000   | 0.000             |
| RB      | WR      | -49.31    | 0.000   | 0.000             |
| S       | TE      | 31.51     | 0.000   | 0.000             |
| S       | WR      | 12.65     | 0.000   | 0.000             |
| TE      | WR      | -19.55    | 0.000   | 0.000             |

**Table S2.** Post-hoc results for maximum velocity.

| Group 1 | Group 2 | Statistic | p-value | Corrected p-value |
|---------|---------|-----------|---------|-------------------|
| CB      | DL      | 173.87    | 0.000   | 0.000             |
| CB      | LB      | 58.42     | 0.000   | 0.000             |
| CB      | OL      | 268.76    | 0.000   | 0.000             |
| CB      | QB      | 71.98     | 0.000   | 0.000             |
| CB      | RB      | 41.49     | 0.000   | 0.000             |
| CB      | S       | 14.72     | 0.000   | 0.000             |
| CB      | TE      | 78.65     | 0.000   | 0.000             |
| CB      | WR      | 16.32     | 0.000   | 0.000             |
| DL      | LB      | -129.72   | 0.000   | 0.000             |
| DL      | OL      | 90.85     | 0.000   | 0.000             |
| DL      | QB      | -21.94    | 0.000   | 0.000             |
| DL      | RB      | -106.56   | 0.000   | 0.000             |
| DL      | S       | -156.87   | 0.000   | 0.000             |
| DL      | TE      | -71.78    | 0.000   | 0.000             |
| DL      | WR      | -157.23   | 0.000   | 0.000             |
| LB      | OL      | 229.19    | 0.000   | 0.000             |
| LB      | QB      | 43.83     | 0.000   | 0.000             |
| LB      | RB      | -5.46     | 0.000   | 0.000             |
| LB      | S       | -43.22    | 0.000   | 0.000             |
| LB      | TE      | 30.33     | 0.000   | 0.000             |
| LB      | WR      | -40.39    | 0.000   | 0.000             |
| OL      | QB      | -68.13    | 0.000   | 0.000             |
| OL      | RB      | -184.70   | 0.000   | 0.000             |
| OL      | S       | -249.33   | 0.000   | 0.000             |
| OL      | TE      | -147.00   | 0.000   | 0.000             |
| OL      | WR      | -250.75   | 0.000   | 0.000             |
| QB      | RB      | -37.68    | 0.000   | 0.000             |
| QB      | S       | -64.81    | 0.000   | 0.000             |
| QB      | TE      | -20.61    | 0.000   | 0.000             |
| QB      | WR      | -61.39    | 0.000   | 0.000             |
| RB      | S       | -29.55    | 0.000   | 0.000             |
| RB      | TE      | 28.82     | 0.000   | 0.000             |
| RB      | WR      | -26.99    | 0.000   | 0.000             |
| S       | TE      | 67.43     | 0.000   | 0.000             |
| S       | WR      | 2.23      | 0.026   | 0.927             |
| TE      | WR      | -61.65    | 0.000   | 0.000             |

**Table S3.** Post-hoc results for high velocity efforts.

| Group 1 | Group 2 | Statistic | p-value | Corrected p-value |
|---------|---------|-----------|---------|-------------------|
| CB      | DL      | 48.51     | 0.000   | 0.000             |
| CB      | LB      | -10.45    | 0.000   | 0.000             |
| CB      | OL      | 73.98     | 0.000   | 0.000             |
| CB      | QB      | 22.60     | 0.000   | 0.000             |
| CB      | RB      | 11.67     | 0.000   | 0.000             |
| CB      | S       | 1.83      | 0.067   | 1.000             |
| CB      | TE      | 11.65     | 0.000   | 0.000             |
| CB      | WR      | -2.71     | 0.007   | 0.244             |
| DL      | LB      | -60.06    | 0.000   | 0.000             |
| DL      | OL      | 19.87     | 0.000   | 0.000             |
| DL      | QB      | -4.13     | 0.000   | 0.001             |
| DL      | RB      | -30.94    | 0.000   | 0.000             |
| DL      | S       | -45.44    | 0.000   | 0.000             |
| DL      | TE      | -29.07    | 0.000   | 0.000             |
| DL      | WR      | -52.47    | 0.000   | 0.000             |
| LB      | OL      | 82.64     | 0.000   | 0.000             |
| LB      | QB      | 26.70     | 0.000   | 0.000             |
| LB      | RB      | 20.80     | 0.000   | 0.000             |
| LB      | S       | 11.91     | 0.000   | 0.000             |
| LB      | TE      | 19.98     | 0.000   | 0.000             |
| LB      | WR      | 7.96      | 0.000   | 0.000             |
| OL      | QB      | -18.97    | 0.000   | 0.000             |
| OL      | RB      | -53.72    | 0.000   | 0.000             |
| OL      | S       | -71.37    | 0.000   | 0.000             |
| OL      | TE      | -52.67    | 0.000   | 0.000             |
| OL      | WR      | -78.31    | 0.000   | 0.000             |
| QB      | RB      | -14.11    | 0.000   | 0.000             |
| QB      | S       | -21.58    | 0.000   | 0.000             |
| QB      | TE      | -13.91    | 0.000   | 0.000             |
| QB      | WR      | -24.40    | 0.000   | 0.000             |
| RB      | S       | -9.80     | 0.000   | 0.000             |
| RB      | TE      | 0.49      | 0.627   | 1.000             |
| RB      | WR      | -14.32    | 0.000   | 0.000             |
| S       | TE      | 9.92      | 0.000   | 0.000             |
| S       | WR      | -4.50     | 0.000   | 0.000             |
| TE      | WR      | -14.15    | 0.000   | 0.000             |

**Table S4.** Post-hoc results for high velocity distance.

| Group 1 | Group 2 | Statistic | p-value | Corrected p-value |
|---------|---------|-----------|---------|-------------------|
| CB      | DL      | 45.06     | 0.000   | 0.000             |
| CB      | LB      | -11.82    | 0.000   | 0.000             |
| CB      | OL      | 76.12     | 0.000   | 0.000             |
| CB      | QB      | 19.17     | 0.000   | 0.000             |
| CB      | RB      | 5.02      | 0.000   | 0.000             |
| CB      | S       | 1.37      | 0.170   | 1.000             |
| CB      | TE      | 12.18     | 0.000   | 0.000             |
| CB      | WR      | 0.48      | 0.634   | 1.000             |
| DL      | LB      | -58.87    | 0.000   | 0.000             |
| DL      | OL      | 24.79     | 0.000   | 0.000             |
| DL      | QB      | -5.84     | 0.000   | 0.000             |
| DL      | RB      | -35.51    | 0.000   | 0.000             |
| DL      | S       | -43.59    | 0.000   | 0.000             |
| DL      | TE      | -26.15    | 0.000   | 0.000             |
| DL      | WR      | -46.31    | 0.000   | 0.000             |
| LB      | OL      | 86.12     | 0.000   | 0.000             |
| LB      | QB      | 24.74     | 0.000   | 0.000             |
| LB      | RB      | 15.66     | 0.000   | 0.000             |
| LB      | S       | 12.96     | 0.000   | 0.000             |
| LB      | TE      | 21.90     | 0.000   | 0.000             |
| LB      | WR      | 12.74     | 0.000   | 0.000             |
| OL      | QB      | -31.14    | 0.000   | 0.000             |
| OL      | RB      | -65.56    | 0.000   | 0.000             |
| OL      | S       | -77.86    | 0.000   | 0.000             |
| OL      | TE      | -59.08    | 0.000   | 0.000             |
| OL      | WR      | -78.96    | 0.000   | 0.000             |
| QB      | RB      | -15.03    | 0.000   | 0.000             |
| QB      | S       | -19.06    | 0.000   | 0.000             |
| QB      | TE      | -10.82    | 0.000   | 0.000             |
| QB      | WR      | -19.74    | 0.000   | 0.000             |
| RB      | S       | -3.76     | 0.000   | 0.006             |
| RB      | TE      | 6.82      | 0.000   | 0.000             |
| RB      | WR      | -4.78     | 0.000   | 0.000             |
| S       | TE      | 11.14     | 0.000   | 0.000             |
| S       | WR      | -0.95     | 0.340   | 1.000             |
| TE      | WR      | -12.27    | 0.000   | 0.000             |

**Table S5.** Post-hoc results for acceleration efforts.

| <b>Group 1</b> | <b>Group 2</b> | <b>Statistic</b> | <b>p-value</b> | <b>Corrected p-value</b> |
|----------------|----------------|------------------|----------------|--------------------------|
| CB             | DL             | 100.06           | 0.000          | 0.000                    |
| CB             | LB             | 4.12             | 0.000          | 0.001                    |
| CB             | OL             | 107.92           | 0.000          | 0.000                    |
| CB             | QB             | 10.84            | 0.000          | 0.000                    |
| CB             | RB             | 19.12            | 0.000          | 0.000                    |
| CB             | S              | 6.07             | 0.000          | 0.000                    |
| CB             | TE             | -17.34           | 0.000          | 0.000                    |
| CB             | WR             | -49.34           | 0.000          | 0.000                    |
| DL             | LB             | -105.19          | 0.000          | 0.000                    |
| DL             | OL             | 15.81            | 0.000          | 0.000                    |
| DL             | QB             | -54.51           | 0.000          | 0.000                    |
| DL             | RB             | -71.26           | 0.000          | 0.000                    |
| DL             | S              | -98.88           | 0.000          | 0.000                    |
| DL             | TE             | -102.00          | 0.000          | 0.000                    |
| DL             | WR             | -128.15          | 0.000          | 0.000                    |
| LB             | OL             | 114.54           | 0.000          | 0.000                    |
| LB             | QB             | 9.25             | 0.000          | 0.000                    |
| LB             | RB             | 17.30            | 0.000          | 0.000                    |
| LB             | S              | 2.46             | 0.014          | 0.500                    |
| LB             | TE             | -22.59           | 0.000          | 0.000                    |
| LB             | WR             | -58.97           | 0.000          | 0.000                    |
| OL             | QB             | -58.14           | 0.000          | 0.000                    |
| OL             | RB             | -78.92           | 0.000          | 0.000                    |
| OL             | S              | -106.08          | 0.000          | 0.000                    |
| OL             | TE             | -107.33          | 0.000          | 0.000                    |
| OL             | WR             | -135.06          | 0.000          | 0.000                    |
| QB             | RB             | 2.19             | 0.029          | 1.000                    |
| QB             | S              | -7.91            | 0.000          | 0.000                    |
| QB             | TE             | -19.75           | 0.000          | 0.000                    |
| QB             | WR             | -34.39           | 0.000          | 0.000                    |
| RB             | S              | -14.45           | 0.000          | 0.000                    |
| RB             | TE             | -31.54           | 0.000          | 0.000                    |
| RB             | WR             | -57.48           | 0.000          | 0.000                    |
| S              | TE             | -22.83           | 0.000          | 0.000                    |
| S              | WR             | -52.59           | 0.000          | 0.000                    |
| TE             | WR             | -26.63           | 0.000          | 0.000                    |

**Table S6.** Post-hoc results for acceleration distance.

| Group 1 | Group 2 | Statistic | p-value | Corrected p-value |
|---------|---------|-----------|---------|-------------------|
| CB      | DL      | 140.58    | 0.000   | 0.000             |
| CB      | LB      | 20.86     | 0.000   | 0.000             |
| CB      | OL      | 202.65    | 0.000   | 0.000             |
| CB      | QB      | 44.68     | 0.000   | 0.000             |
| CB      | RB      | 21.60     | 0.000   | 0.000             |
| CB      | S       | 1.45      | 0.147   | 1.000             |
| CB      | TE      | 5.62      | 0.000   | 0.000             |
| CB      | WR      | -60.53    | 0.000   | 0.000             |
| DL      | LB      | -138.53   | 0.000   | 0.000             |
| DL      | OL      | 56.09     | 0.000   | 0.000             |
| DL      | QB      | -37.82    | 0.000   | 0.000             |
| DL      | RB      | -102.34   | 0.000   | 0.000             |
| DL      | S       | -146.12   | 0.000   | 0.000             |
| DL      | TE      | -105.71   | 0.000   | 0.000             |
| DL      | WR      | -157.65   | 0.000   | 0.000             |
| LB      | OL      | 209.58    | 0.000   | 0.000             |
| LB      | QB      | 39.46     | 0.000   | 0.000             |
| LB      | RB      | 6.25      | 0.000   | 0.000             |
| LB      | S       | -19.76    | 0.000   | 0.000             |
| LB      | TE      | -10.10    | 0.000   | 0.000             |
| LB      | WR      | -83.38    | 0.000   | 0.000             |
| OL      | QB      | -96.73    | 0.000   | 0.000             |
| OL      | RB      | -160.24   | 0.000   | 0.000             |
| OL      | S       | -221.56   | 0.000   | 0.000             |
| OL      | TE      | -155.96   | 0.000   | 0.000             |
| OL      | WR      | -185.77   | 0.000   | 0.000             |
| QB      | RB      | -28.09    | 0.000   | 0.000             |
| QB      | S       | -48.17    | 0.000   | 0.000             |
| QB      | TE      | -32.55    | 0.000   | 0.000             |
| QB      | WR      | -57.08    | 0.000   | 0.000             |
| RB      | S       | -21.04    | 0.000   | 0.000             |
| RB      | TE      | -12.16    | 0.000   | 0.000             |
| RB      | WR      | -67.05    | 0.000   | 0.000             |
| S       | TE      | 4.62      | 0.000   | 0.000             |
| S       | WR      | -59.63    | 0.000   | 0.000             |
| TE      | WR      | -51.42    | 0.000   | 0.000             |

**Table S7.** Post-hoc results for deceleration efforts.

| <b>Group 1</b> | <b>Group 2</b> | <b>Statistic</b> | <b>p-value</b> | <b>Corrected p-value</b> |
|----------------|----------------|------------------|----------------|--------------------------|
| CB             | DL             | 108.43           | 0.000          | 0.000                    |
| CB             | LB             | 11.04            | 0.000          | 0.000                    |
| CB             | OL             | 146.31           | 0.000          | 0.000                    |
| CB             | QB             | 25.15            | 0.000          | 0.000                    |
| CB             | RB             | 38.25            | 0.000          | 0.000                    |
| CB             | S              | -7.36            | 0.000          | 0.000                    |
| CB             | TE             | 34.48            | 0.000          | 0.000                    |
| CB             | WR             | 0.29             | 0.775          | 1.000                    |
| DL             | LB             | -97.00           | 0.000          | 0.000                    |
| DL             | OL             | 59.79            | 0.000          | 0.000                    |
| DL             | QB             | -50.31           | 0.000          | 0.000                    |
| DL             | RB             | -67.77           | 0.000          | 0.000                    |
| DL             | S              | -113.42          | 0.000          | 0.000                    |
| DL             | TE             | -63.44           | 0.000          | 0.000                    |
| DL             | WR             | -110.11          | 0.000          | 0.000                    |
| LB             | OL             | 133.35           | 0.000          | 0.000                    |
| LB             | QB             | 18.68            | 0.000          | 0.000                    |
| LB             | RB             | 28.75            | 0.000          | 0.000                    |
| LB             | S              | -18.36           | 0.000          | 0.000                    |
| LB             | TE             | 25.75            | 0.000          | 0.000                    |
| LB             | WR             | -11.00           | 0.000          | 0.000                    |
| OL             | QB             | -102.15          | 0.000          | 0.000                    |
| OL             | RB             | -119.44          | 0.000          | 0.000                    |
| OL             | S              | -150.13          | 0.000          | 0.000                    |
| OL             | TE             | -112.59          | 0.000          | 0.000                    |
| OL             | WR             | -148.45          | 0.000          | 0.000                    |
| QB             | RB             | -0.52            | 0.600          | 1.000                    |
| QB             | S              | -28.79           | 0.000          | 0.000                    |
| QB             | TE             | -0.84            | 0.403          | 1.000                    |
| QB             | WR             | -25.41           | 0.000          | 0.000                    |
| RB             | S              | -43.90           | 0.000          | 0.000                    |
| RB             | TE             | -0.47            | 0.638          | 1.000                    |
| RB             | WR             | -38.72           | 0.000          | 0.000                    |
| S              | TE             | 39.65            | 0.000          | 0.000                    |
| S              | WR             | 7.80             | 0.000          | 0.000                    |
| TE             | WR             | -34.90           | 0.000          | 0.000                    |

**Table S8.** Post-hoc results for deceleration distance.

| <b>Group 1</b> | <b>Group 2</b> | <b>Statistic</b> | <b>p-value</b> | <b>Corrected p-value</b> |
|----------------|----------------|------------------|----------------|--------------------------|
| CB             | DL             | 143.00           | 0.000          | 0.000                    |
| CB             | LB             | 30.41            | 0.000          | 0.000                    |
| CB             | OL             | 174.66           | 0.000          | 0.000                    |
| CB             | QB             | 44.97            | 0.000          | 0.000                    |
| CB             | RB             | 46.75            | 0.000          | 0.000                    |
| CB             | S              | -3.94            | 0.000          | 0.003                    |
| CB             | TE             | 46.92            | 0.000          | 0.000                    |
| CB             | WR             | -9.85            | 0.000          | 0.000                    |
| DL             | LB             | -118.05          | 0.000          | 0.000                    |
| DL             | OL             | 65.05            | 0.000          | 0.000                    |
| DL             | QB             | -49.06           | 0.000          | 0.000                    |
| DL             | RB             | -99.19           | 0.000          | 0.000                    |
| DL             | S              | -144.64          | 0.000          | 0.000                    |
| DL             | TE             | -83.07           | 0.000          | 0.000                    |
| DL             | WR             | -138.88          | 0.000          | 0.000                    |
| LB             | OL             | 151.73           | 0.000          | 0.000                    |
| LB             | QB             | 31.06            | 0.000          | 0.000                    |
| LB             | RB             | 21.85            | 0.000          | 0.000                    |
| LB             | S              | -33.65           | 0.000          | 0.000                    |
| LB             | TE             | 24.98            | 0.000          | 0.000                    |
| LB             | WR             | -39.62           | 0.000          | 0.000                    |
| OL             | QB             | -113.03          | 0.000          | 0.000                    |
| OL             | RB             | -147.81          | 0.000          | 0.000                    |
| OL             | S              | -176.24          | 0.000          | 0.000                    |
| OL             | TE             | -128.05          | 0.000          | 0.000                    |
| OL             | WR             | -164.71          | 0.000          | 0.000                    |
| QB             | RB             | -20.39           | 0.000          | 0.000                    |
| QB             | S              | -46.36           | 0.000          | 0.000                    |
| QB             | TE             | -14.84           | 0.000          | 0.000                    |
| QB             | WR             | -45.06           | 0.000          | 0.000                    |
| RB             | S              | -49.28           | 0.000          | 0.000                    |
| RB             | TE             | 5.46             | 0.000          | 0.000                    |
| RB             | WR             | -51.54           | 0.000          | 0.000                    |
| S              | TE             | 49.08            | 0.000          | 0.000                    |
| S              | WR             | -5.75            | 0.000          | 0.000                    |
| TE             | WR             | -50.64           | 0.000          | 0.000                    |
